# Supplementary material
Source: MDPI journal article supplement (https://www.mdpi.com/2227-9717/10/12/2480)
Supplement: s1 [file s1]

# Supporting Information

## Solubility of Biocompounds 2,5-furandicarboxylic acid and 5-formylfuran-2-carboxylic acid in binary solvent mixtures of water and 1,4-dioxane

Linli Xu <sup>1,#</sup>, Jianhui Fu <sup>1,#</sup>, Cunbin Du <sup>1</sup>, Qianqian Xu <sup>1,2\*</sup>, Baojian Liu <sup>3</sup>, Zongbi Bao <sup>2,3\*</sup>

<sup>1</sup>School of Pharmaceutical and Materials Engineering, Taizhou University, Taizhou, 318000, China

<sup>2</sup>Key Laboratory of Biomass Chemical Engineering of Ministry of Education, Zhejiang University, Hangzhou, 310027, China

<sup>3</sup>Institute of Zhejiang University-Quzhou, 99 Zheda Road, Quzhou, 324000, China

\*Correspondence: xuqq@tzc.edu.cn (Q. X), baozb@zju.edu.cn (Z. B).

<sup>#</sup>These authors contributed equally to this work.

**Table S1** Calculation of solubility parameters  $\delta$  for FFCA by Fedors' method along with molar volume<sup>a</sup>.

| Group      | number | $\Delta e^a$<br>cal·mol <sup>-1</sup> | $V$<br>cm <sup>3</sup> ·mol <sup>-1</sup> |
|------------|--------|---------------------------------------|-------------------------------------------|
| -CH=       | 2      | 1030                                  | 96.4 <sup>b</sup>                         |
| -C=O       | 1      | 4150                                  |                                           |
| -COOH      | 1      | 6600                                  |                                           |
| -O-        | 1      | 800                                   |                                           |
| >C=        | 2      | 1030                                  |                                           |
| Five rings | 1      | 750                                   |                                           |
| conjugate  | 2      | 400                                   |                                           |
| $\Sigma$   |        | 17220.00                              |                                           |

$$\delta_{\text{solute}} = \left( \frac{\sum_i \Delta e_i}{V} \right)^{0.5} = 27.30 \text{ MPa}^{0.5},$$

<sup>a</sup> cited from (Du, C.B.; Luo, Y.L.; Huang, C.Y.; Li, R.R. The solubility measurement and thermodynamic models correlation of baclofen in twelve pure organic solvents. J. Chem. Eng. Data, 2022, 67: 2655-2661.

<sup>b</sup> obtained from ACD/Labs.

**The calculation of preferential solvation parameters of FDCA/FFCA in binary mixtures of 1,4-dioxane+water**

The preferential solvation parameter  $\delta_{1,3}$  could also be calculated by the inverse Kirkwood-Buff integrals (IKBI) method [1], as presented in Eqs.(1) to (5):

$$\delta_{1,3} = x_{1,3}^L - x_1 = -\delta_{2,3} \quad (1)$$

$$\delta x_{1,3} = \frac{x_1 x_2 (G_{1,3} - G_{2,3})}{x_1 G_{1,3} + x_2 G_{2,3} + V_{cor}} \quad (2)$$

$$G_{1,3} = RT\kappa_T - \bar{V}_3 + \frac{x_2 \bar{V}_2 D}{Q} \quad (3)$$

$$G_{2,3} = RT\kappa_T - \bar{V}_3 + \frac{x_1 \bar{V}_1 D}{Q} \quad (4)$$

$$V_{cor} = 2522.5 \left[ r_3 + 0.1363 (x_{1,3}^L \bar{V}_1 + x_{2,3}^L \bar{V}_2)^{1/3} - 0.085 \right]^3 \quad (5)$$

In above equations, the isothermal compressibility of mixed solvent ( $\kappa_T$ ) could be calculated with the equation of  $\kappa_T = x_1 \kappa_{T,1}^o + x_2 \kappa_{T,2}^o$ ,  $x_i$  and  $\kappa_{T,i}^o$  are volume fraction and isothermal compressibility of pure solvent  $i$ . [2].  $\bar{V}_1$ ,  $\bar{V}_2$  and  $\bar{V}_3$  are the partial molar volume of solvents and solute.  $\bar{V}_1$  and  $\bar{V}_2$  are cited from the reported values and  $\bar{V}_3$  values are obtained from ACD/Labs ( $97.3 \text{ cm}^3 \cdot \text{mol}^{-1}$  and  $96.4 \text{ cm}^3 \cdot \text{mol}^{-1}$  for FDCA and FFCA, respectively).  $V_{cor}$  is the correlation volume and listed in Table S2,  $r_3$  is molecular radius of solute and calculated by  $r_3 = \left( \frac{3 \times 10^{21} V_3}{4\pi N_{AV}} \right)^{1/3}$ . The function  $D$  is the derivative of the standard molar Gibbs energies of transfer ( $\Delta_{tr} G_{(3,2 \rightarrow 1+2)}^o$ ) of solute from pure water to binary mixtures with respect to the proportion of 1,4-dioxane, presented in Eq. (6). The function  $Q$  is the second derivative of the excess molar Gibbs energy of mixing ( $G_{1+2}^{Exc}$ ) with respect to the water composition in mixtures, presented in Eq. (7) [2].

$$D = \left( \frac{\partial \Delta_{tr} G_{(3,2 \rightarrow 1+2)}^o}{\partial x_1} \right)_{T,P} \quad (6)$$

$$Q = RT + x_1 x_2 \left[ \frac{\partial^2 G_{1+2}^{Exc}}{\partial x_2^2} \right]_{T,P} \quad (7)$$

The standard molar Gibbs energies of transfer ( $\Delta_{\text{tr}}G_{(3,2 \rightarrow 1+2)}^0$ ) of solute could be calculated according to regular polynomials in the fifth degree, as presented in Eq. (8).

$$\Delta_{\text{tr}}G_{3,2 \rightarrow 1+2}^0 = RT \ln \left( \frac{x_{3,2}}{x_{3,1+2}} \right) = a + bx_1 + cx_1^2 + dx_1^3 + ex_1^4 + fx_1^5 \quad (8)$$

The equation coefficients and  $D$  values were listed in Table S3 and Table S4. The values of  $G_{1,3}$  and  $G_{2,3}$  were listed in Table S5.  $\delta x_{1,3}$  can be obtained by iterative calculation of (1), (2) and (5), and the results were tabulated in Table S2.

(1) Rodriguez, G.A.; Delgado, D.R.; Fleming, M. Preferential solvation of indomethacin and naproxen in ethyl acetate + ethanol mixtures according to the IKBI method. *Phys. Chem. Liq.* 2014, 52, 533-545.

(2) Jimenez, D.M.; Cardenas, Z.J.; Delgado, D.R.; Pena, M.A.; Martinez, F. Solubility temperature dependence and preferential solvation of sulfadiazine in 1, 4-dioxane+ water co-solvent mixtures. *Fluid Phase Equilib.* 2015, 397, 26-36.

**Table S2.** Correlation volume  $V_{\text{cor}}$  and the preferential solvation parameters  $\delta_{1,3}$  of FDCA and FFCA in binary water + 1,4-dioxane mixtures with different solvent mixing ratio at 303.15 K.

| $x_1$ | $V_{\text{cor}}$ |         | $100\delta_{1,3}$ |       |
|-------|------------------|---------|-------------------|-------|
|       | FDCA             | FFCA    | FDCA              | FFCA  |
| 0.00  | 574.40           | 571.45  | 0.00              | 0.00  |
| 0.05  | 586.90           | 583.37  | -3.06             | -3.09 |
| 0.10  | 647.93           | 648.80  | -2.85             | -2.57 |
| 0.15  | 729.96           | 729.07  | -1.02             | -0.84 |
| 0.20  | 811.53           | 804.72  | 0.97              | 0.74  |
| 0.25  | 887.12           | 873.37  | 2.67              | 1.92  |
| 0.30  | 956.78           | 936.84  | 4.04              | 2.82  |
| 0.35  | 1021.97          | 997.34  | 5.17              | 3.56  |
| 0.40  | 1084.56          | 1057.00 | 6.16              | 4.30  |
| 0.45  | 1145.96          | 1116.92 | 7.13              | 5.14  |
| 0.50  | 1204.95          | 1175.15 | 7.97              | 5.90  |
| 0.55  | 1248.99          | 1218.92 | 7.62              | 5.51  |
| 0.60  | 1250.44          | 1225.04 | 3.72              | 2.00  |
| 0.65  | 1225.75          | 1215.07 | -2.39             | -2.87 |
| 0.70  | 1230.56          | 1237.00 | -6.03             | -5.08 |
| 0.75  | 1263.34          | 1284.15 | -7.31             | -5.12 |
| 0.80  | 1309.09          | 1340.55 | -7.47             | -4.33 |
| 0.85  | 1362.50          | 1399.56 | -6.92             | -3.24 |
| 0.90  | 1423.06          | 1458.41 | -5.66             | -2.08 |
| 0.95  | 1493.24          | 1516.02 | -3.48             | -0.96 |
| 1.00  | 1576.69          | 1570.92 | 0.00              | 0.00  |

**Table S3.** Gibbs energy of transfer ( $\text{kJ}\cdot\text{mol}^{-1}$ ) of FDCA and FFCA in 1,4-dioxane (1) + water (2) mixtures at 303.15 K.

| $x_1$ | FDCA    | FFCA    |
|-------|---------|---------|
| 0.00  | 0       | 0       |
| 0.20  | -8.279  | -7.919  |
| 0.40  | -11.132 | -10.069 |
| 0.60  | -11.799 | -10.560 |
| 0.80  | -11.271 | -10.183 |
| 1.00  | -7.295  | -8.912  |

**Table S4.**  $D$  values ( $\text{kJ} \cdot \text{mol}^{-1}$ ) of FDCA and FFCA in 1,4-dioxane (1) + water (2) mixtures at 303.15 K.

| $x_1$ | FDCA   | FFCA   |
|-------|--------|--------|
| 0.00  | -62.17 | -67.53 |
| 0.05  | -50.56 | -50.76 |
| 0.10  | -40.44 | -37.58 |
| 0.15  | -31.75 | -27.42 |
| 0.20  | -24.44 | -19.74 |
| 0.25  | -18.42 | -14.06 |
| 0.30  | -13.57 | -9.95  |
| 0.35  | -9.77  | -7.04  |
| 0.40  | -6.87  | -4.98  |
| 0.45  | -4.71  | -3.50  |
| 0.50  | -3.10  | -2.35  |
| 0.55  | -1.85  | -1.36  |
| 0.60  | -0.71  | -0.39  |
| 0.65  | 0.55   | 0.66   |
| 0.70  | 2.19   | 1.82   |
| 0.75  | 4.50   | 3.08   |
| 0.80  | 7.77   | 4.38   |
| 0.85  | 12.34  | 5.62   |
| 0.90  | 18.54  | 6.64   |
| 0.95  | 26.73  | 7.22   |
| 1.00  | 37.29  | 7.13   |

**Table S5.**  $G_{1,3}$  and  $G_{2,3}$  values ( $\text{cm}^3 \cdot \text{mol}^{-1}$ ) of solute (3) in 1,4-dioxane (1) + water (2) mixtures at 303.15 K.

| $x_1$ | $G_{1,3}$ |         | $G_{2,3}$ |         |
|-------|-----------|---------|-----------|---------|
|       | FDCA      | FFCA    | FDCA      | FFCA    |
| 0.00  | -542.20   | -579.72 | -96.148   | -95.25  |
| 0.05  | -432.72   | -433.16 | -176.89   | -176.31 |
| 0.10  | -358.63   | -339.20 | -230.76   | -220.35 |
| 0.15  | -305.19   | -275.74 | -268.75   | -244.27 |
| 0.20  | -265.45   | -231.92 | -296.92   | -257.33 |
| 0.25  | -235.21   | -201.36 | -319.11   | -265.41 |
| 0.30  | -212.10   | -180.26 | -338.48   | -272.98 |
| 0.35  | -194.67   | -166.18 | -358.41   | -284.18 |
| 0.40  | -182.03   | -157.44 | -382.74   | -302.98 |
| 0.45  | -173.12   | -152.32 | -415.18   | -332.07 |
| 0.50  | -165.57   | -147.81 | -451.49   | -364.62 |
| 0.55  | -151.98   | -136.38 | -448.71   | -355.54 |
| 0.60  | -120.13   | -108.15 | -284.91   | -198.14 |
| 0.65  | -81.22    | -77.35  | 43.573    | 73.06   |
| 0.70  | -62.61    | -67.28  | 304.17    | 237.64  |
| 0.75  | -59.81    | -70.19  | 460.06    | 285.96  |
| 0.80  | -62.79    | -76.19  | 578.64    | 285.55  |
| 0.85  | -68.10    | -82.14  | 696.16    | 266.01  |
| 0.90  | -75.00    | -87.27  | 830.33    | 236.84  |
| 0.95  | -83.89    | -91.44  | 989.35    | 198.62  |
| 1.00  | -95.44    | -94.54  | 1180.2    | 149.32  |
